# Supplementary material
Source: MDPI journal article supplement (https://www.mdpi.com/1996-1073/14/24/8437)
Supplement: s1 [file s1]

**Supplementary Materials:** The following more specific information is available online:

Table S1: Legal forms of examined companies, available at <https://doi.org/10.1371/journal.pone.0240893.t001>;

Table S2: Number of employees, available at <https://doi.org/10.1371/journal.pone.0240893.t002>;

Table S3: Position of the respondent, available at <https://doi.org/10.1371/journal.pone.0240893.t003>;

Table S4: Respondents' professional experience in years, available at <https://doi.org/10.1371/journal.pone.0240893.t004>;

Table S5: Provinces where the businesses operate, available at <https://doi.org/10.1371/journal.pone.0240893.t005>;

Table S6: Experts' characteristics, available at <https://doi.org/10.1371/journal.pone.0240893.t006>
